# Supplementary material for: Multiomics analysis revealed miRNAs as potential regulators of the immune response in Carassius auratus gills to Aeromonas hydrophila infection
Source: Front Immunol. 2023 Feb 3;14:1098455. doi: 10.3389/fimmu.2023.1098455 (PMC9938762; doi:10.3389/fimmu.2023.1098455)
Supplement: Supplementary Table 4 — Summary of sequenced miRNAs in the gills of C. auratus. [file Table_4.xlsx]

## Sheet: Sheet1
Supplemented Table 4
miRNA family	Sequence	Count
miR-10	ACCCTGTAGATCCGAATTTGT	128
miR-10-5p	ACCCTGTAGATCCGGATTTGTT	2933
miR-10a	TACCCTGTAGATCCGAATTTG	129
miR-10a-5p	TACCCTGTAGATCCGAATTTGT	131
miR-10b	ACCCTGTAGAACCGAATTTGTG	753
miR-10b-3p	CAGATTCGATCCTAGGGGAGT	5
miR-10b-5p	TACCCTGTAGAACCGAATTTGT	782
miR-10c	ACCCTGTAGATCCGGATTTGTG	3423
miR-10c-3p	AAATTCGTATCTAGGGGAGTAT	6
miR-10c-5p	TACCCTGTAGATCCGGATTTGT	3588
miR-10d	TACCCTGTAGAACCGAATGTGT	57
miR-10d-3p	CAGATTCGGTTTTAGGGGAGT	3
miR-10d-5p	TACCCTGTAGAACCGAATGTGTG	57
miR-21	TAGCTTATCAGACTGGTGTTGGC	690064
miR-21-5p	TAGCTTATCAGACTGGTGTTGG	738398
miR-21a-5p	TAGCTTATCAGACTGGTGTTGGCT	625433
miR-21b-3p	GACAACAGTCTGTAGGCTGTCT	371
miR-21c	TAGCTTATCAGACTGGTGAAA	1368
miR-27a	TTCACAGTGGCTAAGTTCCGCCA	886
miR-27a-3p	TTCACAGTGGCTAAGTTCCG	1541
miR-27a-5p	AGGACTTAGCTCACTCTGTGAAC	303
miR-27b	GTTCACAGTGGCTAAGTTCT	3462
miR-27b-3p	TTCACAGTGGCTAAGTTCT	3600
miR-27b-5p	AGAGCTTAGCTGATTGGTGAAC	736
miR-27c-3p	TTCACAGTGGTTAAGTTCTGC	1345
miR-27c	TTCACAGTGGCTAAGTTCA	2198
miR-27c-5p	AGGACTTAACCCACATGTGAAC	21
miR-27d	TTCACAGTGGCTAAGTTCTT	1966
miR-27d-3p	TTCACAGTGGCTAAGTTC	6672
miR-27d-5p	AGGACTTAACCCACATGTGAACA	33
miR-27e	TTCACAGTGGCTAAGTTCAGT	2220
miR-29a	TAGCACCATCTGAAATCGGTT	82
miR-29a-3p	TAGCACCATTTGAAATCGGTT	12079
miR-29a-5p	ACCGATTTCTTTTGGTGTTCAGAGT	15
miR-29b	TAGCACCATTTGAAATCAGTGT	869
miR-29b-3p	TAGCACCATTTGAAATCAGTGTT	815
miR-29c	TAGCACCATTTGAAATCGGTTT	580
miR-29c-3p	TAGCACCATTTGAAATCGGTTA	11902
miR-29d-5p	GCTGGTTTCAAGTGGTGTCTTAGA	86
miR-29e	TAGCACCATTTGAAATCAGTGTTT	807
miR-100	AACCCGTAGATCCGAACTT	6241
miR-100-3p	ACAAGCTCGTGTCTATAGGTAT	794
miR-100-5p	AACCCGTAGATCCGAACTTGTG	6348
miR-100a-5p	AACCCGTAGATCCGAACTTGTGTT	4311
miR-128	TCACAGTGAACCGGTCTCTT	36433
miR-128-3p	TCACAGTGAACCGGTCTCTTT	37125
miR-128-5p	CGGGGCCGTGTCACTGTATGAGA	45
miR-128b	TCACAGTGAACCGGTCTCTTTTT	34581
miR-132	TAACAGTCTACAGCCATGGTCGT	594
miR-132-3p	TAACAGTCTACAGCCATGGTCG	628
miR-132-5p	ACCGTGGCATTAGATTGTTACT	1
miR-132a	ACCGTGGCTTTAGATTGTTACT	33
miR-132b	ACCATGGCTGTAGACTGTTACC	16
miR-142	TCCATAAAGTAGAAAGCACTA	8738
miR-142-3p	GTAGTGTTTCCTACTTTATGGA	876
miR-142-5p	CATAAAGTAGACAGCACTACT	3493
miR-142a-3p	TGTAGTGTTTCCTACTTTATGGA	831
miR-142b	CATAAAGTAGAAAGCACTACTA	7311
miR-142b-3p	GTAGTGTTTCCTACTTTATGGT	283
miR-142b-5p	ATAAAGTAGACAGCACTACTAA	3153
miR-145	GTCCAGTTTTCCCAGGAATCA	368
miR-145-3p	ATTCCTGGAAATACTGTTCTT	910
miR-145-5p	GTCCAGTTTTCCCAGGAATCCC	1594
miR-145a-3p	ATTCCTGGAAATACTGTTCTTT	618
miR-145a-5p	GTCCAGTTTTCCCAGGAATCCCT	1642
miR-145b	GTCCAGTTTTCCCAGGGATCT	3
miR-148	TCAGTGCATTACAGAACTTTG	7365
miR-148-5p	AAAGTTCTGTGATCCACTCCGA	13
miR-148a	TCAGTGCACTACAGAACTTTG	7
miR-148a-3p	TCAGTGCACTACAGAACTTTGT	7
miR-148a-5p	AAGTTCTGTGATACACTCAGACT	37
miR-148b	TCAGTGCATCACAGAACTTTG	4
miR-148b-3p	TCAGTGCATGACAGAACTTTGT	7064
miR-148b-5p	AAGTTCTGTGATACACTCAGA	35
miR-150	TCTCCCAATCCTTGTACCAGTG	14472
miR-150-5p	TCTCCCAATCCTTGTACCAGT	14194
miR-155	TTAATGCTAATCGTGATAGGGG	553
miR-155-5p	TTAATGCTAATCGTGATAGGGGT	573
miR-200-3p	TAATACTGTCTGGTAATGA	12
miR-200a	TAACACTGTCTGGTAACGATGTT	11201
miR-200a-3p	TAACACTGTCTGGTAACGATGT	11032
miR-200a-5p	CATCTTACCGGACAGTGCTG	283
miR-200b	TAATACTGCCTGGTAATGATG	8494
miR-200b-3p	TAATACTGCCTGGTAATGATGAT	5741
miR-200b-5p	CATCTTACGAGGCAGCATTGGA	182
miR-200c-3p	TAATACTGCCTGGTAATGATGC	3479
miR-200c-5p	CATCTTACAAGGCAGTTTTGGA	30
miR-206	TGGAATGTAAGGAAGTGTGTGGT	178938
miR-206-3p	TGGAATGTAAGGAAGTGTGTGG	240885
miR-206-5p	ACATGCTTCCTTATATGCCCAT	13
miR-210	CTGTGCGTGTGACAGCGGCT	1736
miR-210-3p	CTGTGCGTGTGACAGCGGCTA	1687
miR-210-5p	AGCCACTGACTAACGCACATTG	2749
miR-210a	TGTGCGTGTGACAGCGGCTA	1548
miR-17	CAAAGTGCTTACAGTGCA	1235
miR-17-3p	CTGCAGTGGAGGCACTTCTAGCA	42
miR-17-5p	CAAAGTGCTTACAGTGCAGGTAG	1032
miR-17a-3p	ACTGCAGTGGAGGCACTTCT	35
miR-17a-5p	CAAAGTGCTTACAGTGCAGGTA	1185
miR-17b	TAAAGTGGATGATGTGGCTAGGTT	1
miR-26-3p	CCTGTTCTTGGTTACTTGCACT	1
miR-26-5p	TTCAAGTAATCCAGGATAGG	37464
miR-26a	TTCAAGTAATCCAGGATAGGCTT	18821
miR-26a-3p	CCTATTCGGGATGACTTGGTTC	3838
miR-26a-5p	TTCAAGTAATCCAGGATAGGCT	20254
miR-26b	TTCAAGTAATCCAGGATAGGTT	15698
miR-26b-5p	TTCAAGTAATTCAGGATAGGT	81
miR-26c	TTCAAGTAATCCAGGATAGGTTT	15104
miR-26d-5p	TTCAAGTAATCTAGGATAGGCT	31
miR-144	AGGATATCATCGTATACTGT	2964
miR-144-3p	TACAGTATAGATGATGTACTAT	1447
miR-144-5p	GGATATCATCGTATACTGTAA	2918
miR-146a	TGAGAACTGAATTCCATAGATGG	195630
miR-146a-3p	ATCTATGGGCTCAGTTCTTCTG	45
miR-146a-5p	TGAGAACTGAATTCCATAGATGGT	192742
miR-146b	TGAGAACTGAATTCCAAGGGTGT	5586
miR-146b-3p	CTAGGCAGTCGTTCTGGG	18
miR-146b-5p	TGAGAACTGAATTCCAAGGGTGTCTGT	5191
miR-146d-3p	CCACGGAGTTCAGTTCTTAAGT	18
miR-146d-5p	TTGAGAACTGAATTCCAAGGGTT	306
novel-miR-1	TTGGGGTGCGAGAGGTCCCGG	64
novel-miR-4	CGGCCCAGGTCGGAAACGGAGCAG	91
novel-miR-6	ACTGTGGAAGTCAATGGGTAA	22
novel-miR­-10	TCACAGACTAGATAGATGAGA	24
novel-miR-12	TACTGTGGAAGTCAATGGGGA	15
novel-miR-21	GTCTCTCTGGCGCAATCGGT	22
novel-miR-25	ACTGTGGAAGTCAATGGGTACC	137
